# Supplementary material
Source: PubMed Central journal article supplement (PMC3791765)
Supplement: 1312197110_pnas.201312197SI.pdf [file 1312197110_pnas.201312197SI.pdf]

# Supporting Information

Cieslewicz et al. 10.1073/pnas.1312197110

## SI Results

Human and mouse lesions of atherosclerosis contain both M1 and M2 macrophage phenotypes (1, 2). Previous work has suggested the presence of M2 macrophages, expressing suppressor of cytokine signaling 3 (SOCS-3) protein, in late-stage atherosclerotic lesions (3, 4). Additionally, it has been observed in the same mouse model that knockdown of SOCS-3 and its associated anti-inflammatory effects exacerbates atherosclerosis. Thus, we tested whether M2pep binds M2 macrophages isolated from late-stage atherosclerotic lesions of apolipoprotein E (ApoE<sup>-/-</sup>) mice and elicited peritoneal macrophages from the same mice (Fig. S6). Macrophages were identified by staining for the macrophage marker CD68, and the M2 macrophage subset was identified by the CD301/Mgl1 marker. Both lesion and peritoneal Mgl1<sup>+</sup> macrophages showed a significant 1.5-fold to two-fold differential in the ratio of M2pep vs. scrambled M2pep relative to Mgl1<sup>-</sup> cells, demonstrating preferential M2pep binding to M2 macrophages isolated from two different sites.

## SI Materials and Methods

**Generation of Macrophage Cell Types.** Bone marrow cells were plated in 100-mm Petri dishes at 5 million cells per plate. Cells were differentiated into macrophages for 7 d using media containing RPMI, 20% (vol/vol) horse serum (CellGro), 1% (vol/vol) antimicrobial/antimycotic (CellGro), and 20 ng/mL recombinant mouse macrophage colony-stimulating factor (Shenandoah Biotech). Media were replenished on day 4. Seven-day differentiated macrophages were activated for 48 h in RPMI media containing 20% (vol/vol) horse serum and cytokines. The cytokines used were 25 ng/mL IFN- $\gamma$  (R&D Systems) and 100 ng/mL LPS (InvivoGen) for M1 macrophages and 25 ng/mL IL-4 (R&D Systems) for M2 macrophages. All cells were cultured at 37 °C in a 5% CO<sub>2</sub> atmosphere.

**Generation of K<sub>d</sub> Curve.** The K<sub>d</sub> of M2pep with an oligoethylene-glycol-biotin tag was quantified in a titration flow cytometry as-

say. A total of 10<sup>5</sup> M2 macrophages per sample were incubated with varying concentrations of M2pep. The presence of M2pep was probed with FITC-conjugated streptavidin (eBioscience) and analyzed on a FACSCanto flow cytometer (Becton Dickinson). To calculate K<sub>d</sub>, the median fluorescence intensities were fit by least-squares regression to the following equation:

$$MFI_{\text{expected}} = MFI_{\text{min}} + MFI_{\text{range}} \left( \frac{[\text{peptide}]}{[\text{peptide}] + K_d} \right).$$

**Isolation of Atherosclerotic Lesion Cells.** Peritoneal and lesion macrophages were isolated from ApoE<sup>-/-</sup> mice with advanced lesions of atherosclerosis (45–60 wk). Resident peritoneal macrophages were harvested by injection of 5 mL of PBS/EDTA and kept on wet ice before staining for flow cytometric analysis. The mouse aorta, brachiocephalic artery, and carotid arteries were dissected following collection of the peritoneal macrophages. After removing excess fat from the dissected aorta and its branches, the aorta was incubated for 5 min at 37 °C in Hepes-buffered DMEM with 1.3 mg/mL collagenase type III (Worthington), which allowed the adventitia to be easily removed from the aortic media and intima. The remaining vessel was chopped into small segments and then incubated for 1 h in Hepes-buffered Media 199 containing 125 U/mL collagenase type XI (Sigma), 60 U/mL hyaluronidase (Sigma), 60 U/mL DNase I (Sigma), and 450 U/mL collagenase type I (Worthington). The cells were passed through a 70-mm strainer to remove tissue debris and then stained for analysis by flow cytometry.

**ELISA Phage-Binding Study.** M1, M2, and unactivated macrophages and dendritic cells were incubated with 1 × 10<sup>5</sup> pfu/μL M2pep Phage or Phage Library. The presence of phage was probed using a rabbit anti-M13 primary antibody and HRP-conjugated anti-rabbit secondary antibody (Sigma). Substrate was added and quenched, and absorbance at 450 nm and 540 nm was read on a plate reader.

1. Khamlou-Laschet J, et al. (2010) Macrophage plasticity in experimental atherosclerosis. *PLoS ONE* 5(1):e8852.
2. Bouhrel MA, et al. (2007) PPARgamma activation primes human monocytes into alternative M2 macrophages with anti-inflammatory properties. *Cell Metab* 6(2): 137–143.

3. Tang J, Raines EW (2005) Are suppressors of cytokine signaling proteins recently identified in atherosclerosis possible therapeutic targets? *Trends Cardiovasc Med* 15(7):243–249.
4. Tang J, et al. (2005) The absence of platelet-derived growth factor-B in circulating cells promotes immune and inflammatory responses in atherosclerosis-prone ApoE<sup>-/-</sup> mice. *Am J Pathol* 167(3):901–912.

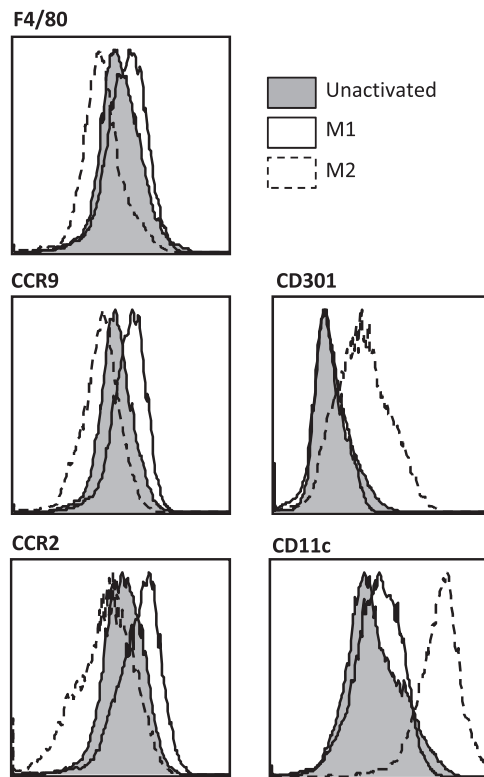

**Fig. S1.** Immunophenotyping of M1 and M2 cells by flow cytometry. All cells stain positively for F4/80. M1 cells are CCR9<sup>hi</sup>CCR2<sup>hi</sup>. M2 cells are CD301<sup>hi</sup>CD11c<sup>hi</sup>.

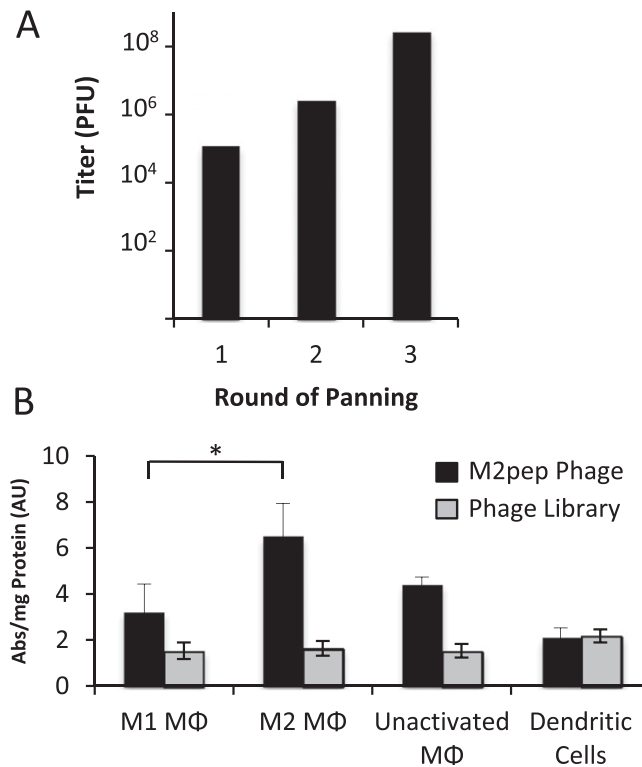

**Fig. S2.** Phage titer following each round of phage panning and selection of phage selective for M2 macrophages. (A) Increasing phage titer with each round of panning indicates selection of phage specific for M2 macrophages. (B) M2pep Phage binding to M1, M2, and unactivated macrophages and dendritic cells was quantified by whole-cell ELISA and normalized to protein content using a bicinchoninic acid colorimetric assay. AU, arbitrary units. \* $P = 0.041$ .

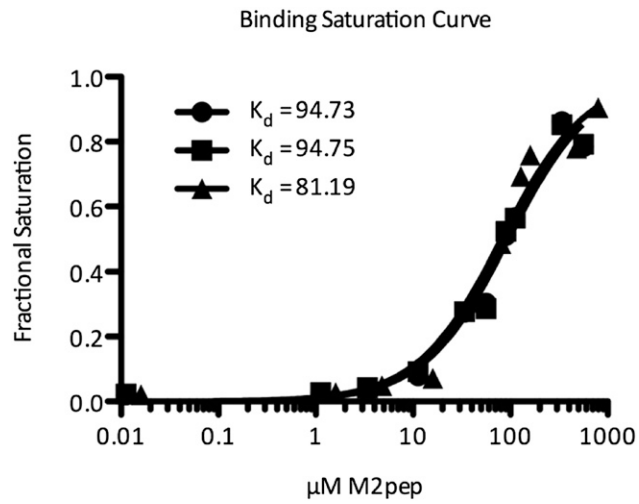

**Fig. S3.**  $K_d$  titration binding curve. The  $K_d$  of M2pep with an oligoethyleneglycol-biotin tag binding M2 macrophages was measured by means of a peptide concentration titration flow cytometry experiment. Three replicate experiments were performed.







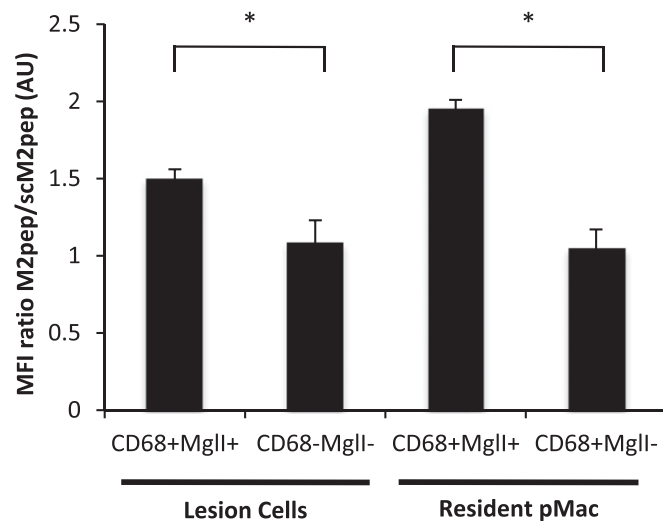

**Fig. S7.** M2 macrophages are detected in peritoneal and lesion macrophages of ApoE<sup>-/-</sup> mice with advanced lesions of atherosclerosis. Lesion and resident peritoneal cells were isolated from 45- to 60-wk-old ApoE<sup>-/-</sup> mice on a chow diet ( $n = 3$  separate pools each from 2 mice) and analyzed by flow cytometry. Cells were stained for CD68 (macrophages), for Mgl1 (M2 macrophages), and with M2pep or scM2pep. The mean fluorescence intensity (MFI) ratio of M2pep/scM2pep is shown for different gated populations with  $*P = 0.034$  and  $*P = 0.0013$  for lesion and peritoneal macrophages (pMac), respectively.

**Table S1. Antibody clone numbers, vendors, and conjugations**

| Marker           | Clone       | Vendor            | Conjugation           | Detection                       |
|------------------|-------------|-------------------|-----------------------|---------------------------------|
| B220             | RA3-6B2     | BD Pharmingen     | FITC, PE              | B cells                         |
| CCR2             | 475301      | R&D Systems       | PE                    | M1 macrophages, M2c macrophages |
| CCR9 (CD199)     | CW-1.2      | eBioscience       | FITC                  | M1 macrophages                  |
| CD11b            | M1/70       | eBioscience       | eFluor450             | Leukocytes                      |
| CD11c            | N418        | eBioscience       | PE                    | M2 macrophages                  |
| CD3              | 17A2        | BD Pharmingen     | PE                    | T cells                         |
| CD301 (MglI)     | ER-MP23     | AbDserotec        | FITC                  | M2 macrophages                  |
| CD68             | FA-11       | AbDserotec        | PE                    | Macrophages                     |
| CD86             | GL1         | eBioscience       | PE-Cy5                | M2b macrophages                 |
| F4/80            | Cl:A3-1     | AbDserotec        | FITC                  | Macrophages                     |
| F4/80            | Cl:A3-1     | Abcam             | None                  | Macrophages                     |
| F4/80            | BM8         | Life Technologies | Alexa Fluor 647       | Macrophages                     |
| Goat anti-rabbit |             | Sigma             | FITC                  |                                 |
| Goat anti-rat    |             | Life Technologies | Alexa Fluor 555       |                                 |
| Ly6C             | AL-21       | BD Pharmingen     | APC-cy7               | Macrophage subset               |
| Ly6G             | 1A8         | BD Pharmingen     | FITC, PE, PerCP Cy5.5 | Neutrophils                     |
| MHCII            | M5.114.15.2 | eBioscience       | FITC                  | Macrophage subset               |
| NeutrAvidin      |             | Life Technologies | PE                    | Peptide                         |
| Rabbit anti-M13  |             | Sigma             | None                  | Phage                           |
| Streptavidin     |             | eBioscience       | FITC, PE-cy7          | Peptide                         |

APC, allophycocyanin; PE, phycoerythrin; PerCP, peridinin chlorophyll protein complex.
